# Supplementary material for: Recent Applications of Artificial Intelligence from Histopathologic Image-Based Prediction of Microsatellite Instability in Solid Cancers: A Systematic Review
Source: MDPI journal article supplement (doi:10.3390/cancers14112590), 2022-05-24
Supplement: s1 [file s1]

# Recent Applications of Artificial Intelligence from Histopathologic Image-Based Prediction of Microsatellite Instability in Solid Cancers: A Systematic Review

Mohammad Rizwan Alam, Jamshid Abdul-Ghafar, Kwangil Yim, Nishant Thakur, Sung Hak Lee, Hyun-Jong Jang, Chan Kwon Jung and Yosep Chong

**Table S1.** Artificial intelligence models used for microsatellite instability prediction in each study.

| Cancer type        | AI models         | Authors          | Ref. |
|--------------------|-------------------|------------------|------|
| Colorectal cancer  | ResNet18          | Kather et al.    | [29] |
|                    |                   | Cao et al.       | [50] |
|                    |                   | Zhu et al.       | [55] |
|                    | ShuffleNet        | Echle et al.     | [30] |
|                    |                   | Kather et al.    | [53] |
|                    |                   | Krause et al.    | [56] |
|                    | Inception-V3      | Zhang et al.     | [51] |
|                    |                   | Lee et al.       | [48] |
|                    | ResNet50          | Schmauch et al.  | [54] |
| Endometrial cancer | AlexNet           | Ke et al.        | [52] |
|                    | MSINet            | Yamashita et al. | [49] |
|                    | ResNet18          | Kather et al.    | [29] |
|                    |                   | Wang et al.      | [59] |
|                    | Inception-V3      | Zhang et al.     | [51] |
| Gastric cancer     | InceptionResNetVI | Hong et al.      | [57] |
|                    | ResNet18          | Kather et al.    | [29] |
|                    |                   | Zhu et al.       | [55] |
| Ovarian cancer     | ResNet50          | Schmauch et al.  | [54] |
|                    | Random forest     | Zeng et al.      | [58] |

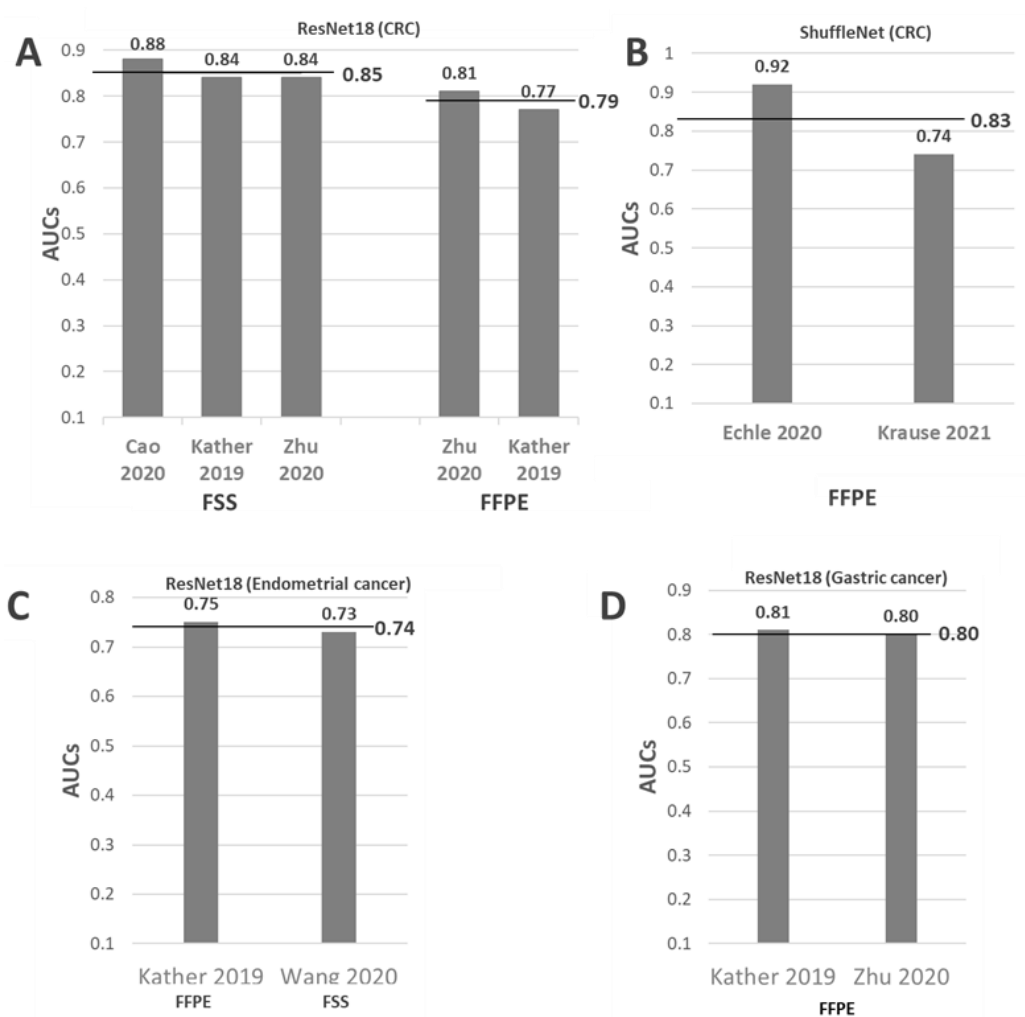

**Figure S1.** Comparison of AUCs of AI models. (A) Comparison of ResNet18 in colorectal cancer. (B) comparison of ShuffleNet in colorectal cancer. (C) Comparison of ResNet18 in endometrial cancer. (D) Comparison of ResNet18 in gastric cancer.
